# Supplementary material for: Tumor microenvironment-aware, single-transcriptome prediction of microsatellite instability in colorectal cancer using meta-analysis
Source: PubMed Central journal article supplement (PMC9012745; doi:10.1038/s41598-022-10182-3), 2022-04-15
Supplement: 41598_2022_10182_MOESM1_ESM.pdf [file 41598_2022_10182_MOESM1_ESM.pdf]

## **Supplementary Information**

### **Tumor microenvironment-aware, single-transcriptome prediction of microsatellite instability in colorectal cancer using meta-analysis**

Mi-Kyoung Seo<sup>1</sup>, Hyundeok Kang<sup>1</sup>, Sangwoo Kim<sup>1\*</sup>

#### **Supplementary material**

##### **Supplementary Figures**

Figure S1 Boxplot of MMR gene expression.

Figure S2 Distribution of features in the MAPpairs model.

Figure S3 Heatmap of 44 features in the MAPsig model.

Figure S4 Barplot for correlation of features and probability for MSI in the MAPsig model.

Figure S5 PRISMA Flow Diagram.

##### **Supplementary Tables**

Table S1 The dataset used in this study

Table S2 Results of the MAP model in the validation datasets

Table S3 The MAP signatures

Table S4 The MSI signature in STAD, UCEC and preMSIm

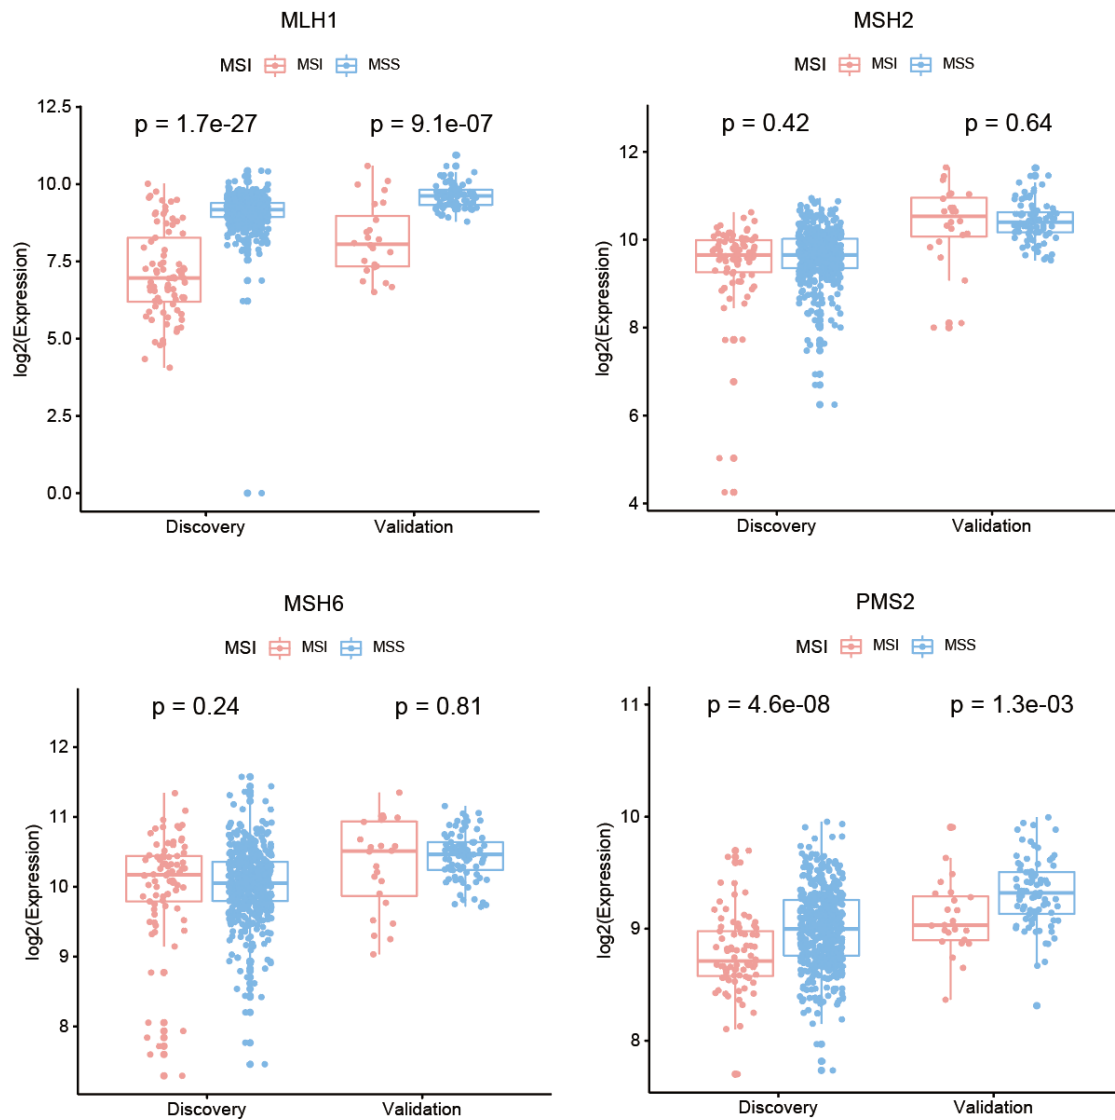

**Figure S1.** Boxplots of MMR gene expression. Boxplots of the gene expression of four genes implicated in mismatch repair (MMR) for the Discovery (TCGA-CRC) and RNA-seq validation datasets (Vasaikar *et al.*). Blue dots indicate MSS tumors and pink dots indicate MSI tumors.

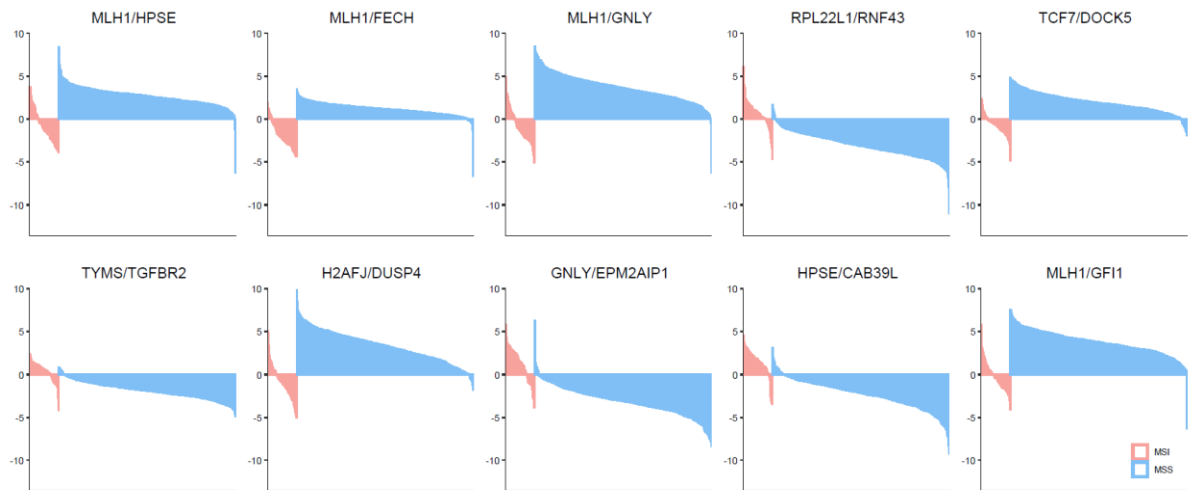

**Figure S2.** Distribution of features in the MAPpairs model. The y-axis means the ratio of two genes (feature) in each sample. Blue indicates MSS and pink indicates MSI tumors.

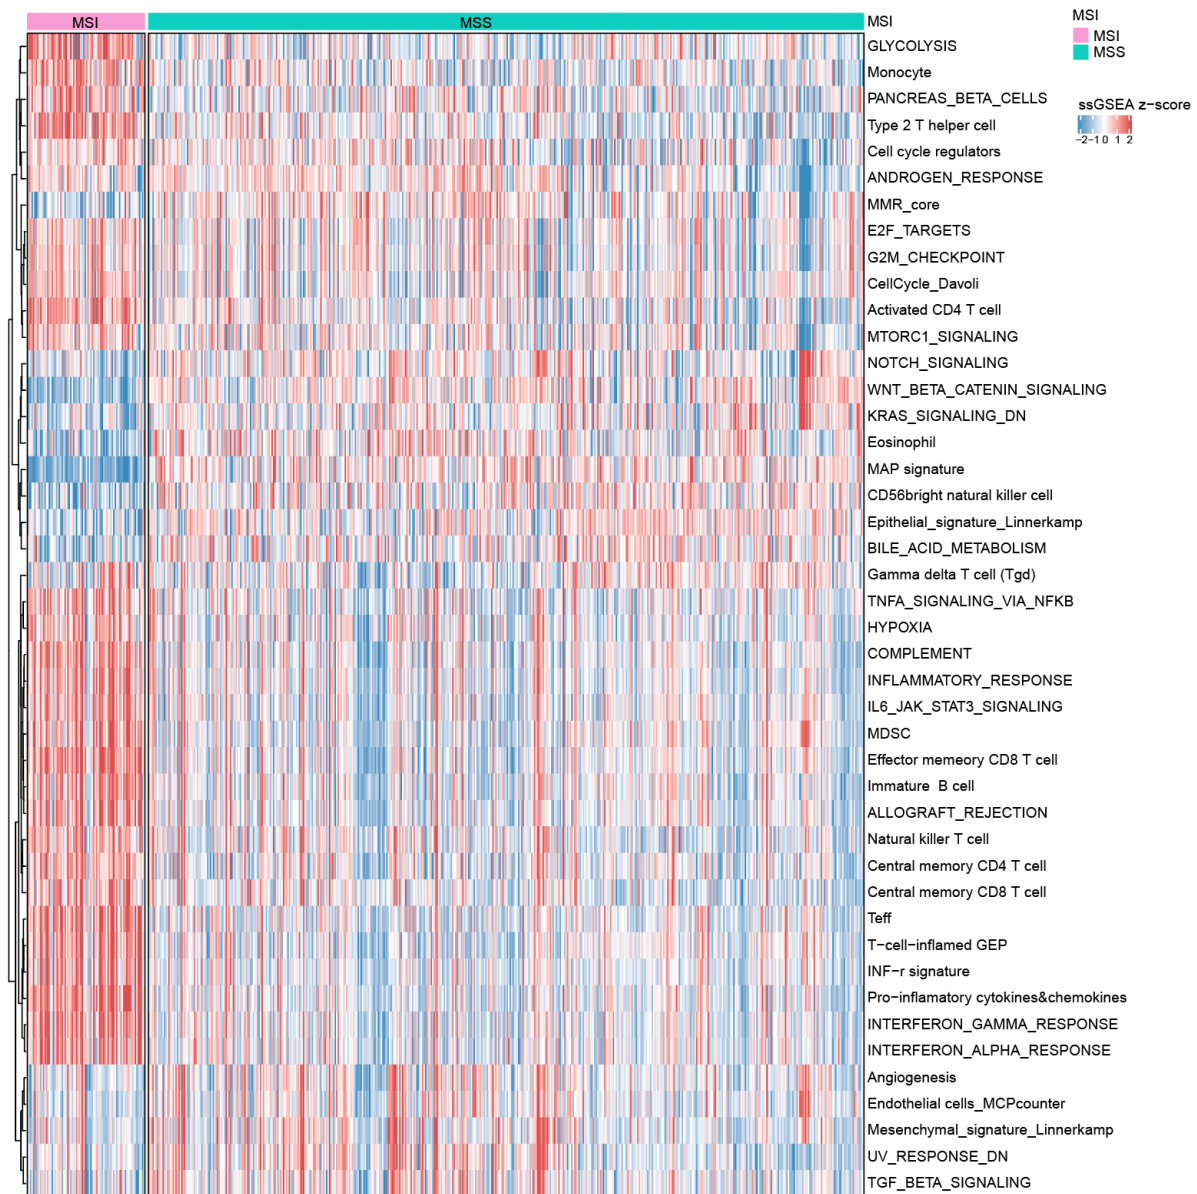

**Figure S3.** Heatmap of 44 features in the MAPsig model. Heatmap was based on the inferred ssGSEA score for the 44 features of the MAPsig model. \*ssGSEA ; single-sample gene set enrichment analysis. The figure was created using the ComplexHeatmap (v2.2.0) package with R (v3.6.0) software.

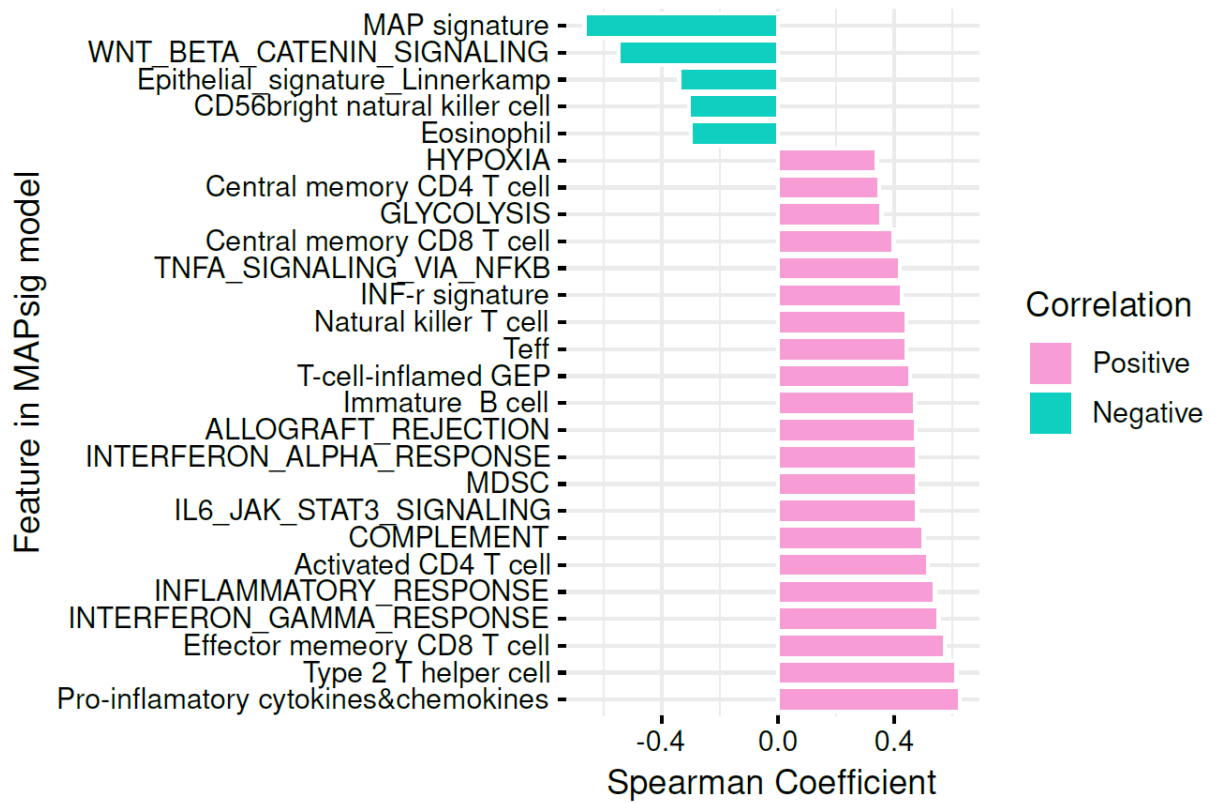

**Figure S4.** Barplot for correlation of features and probability for MSI in the MAPsig model. The figure was created using the ggpubr (v0.4.0) package with R (v3.6.0) software.

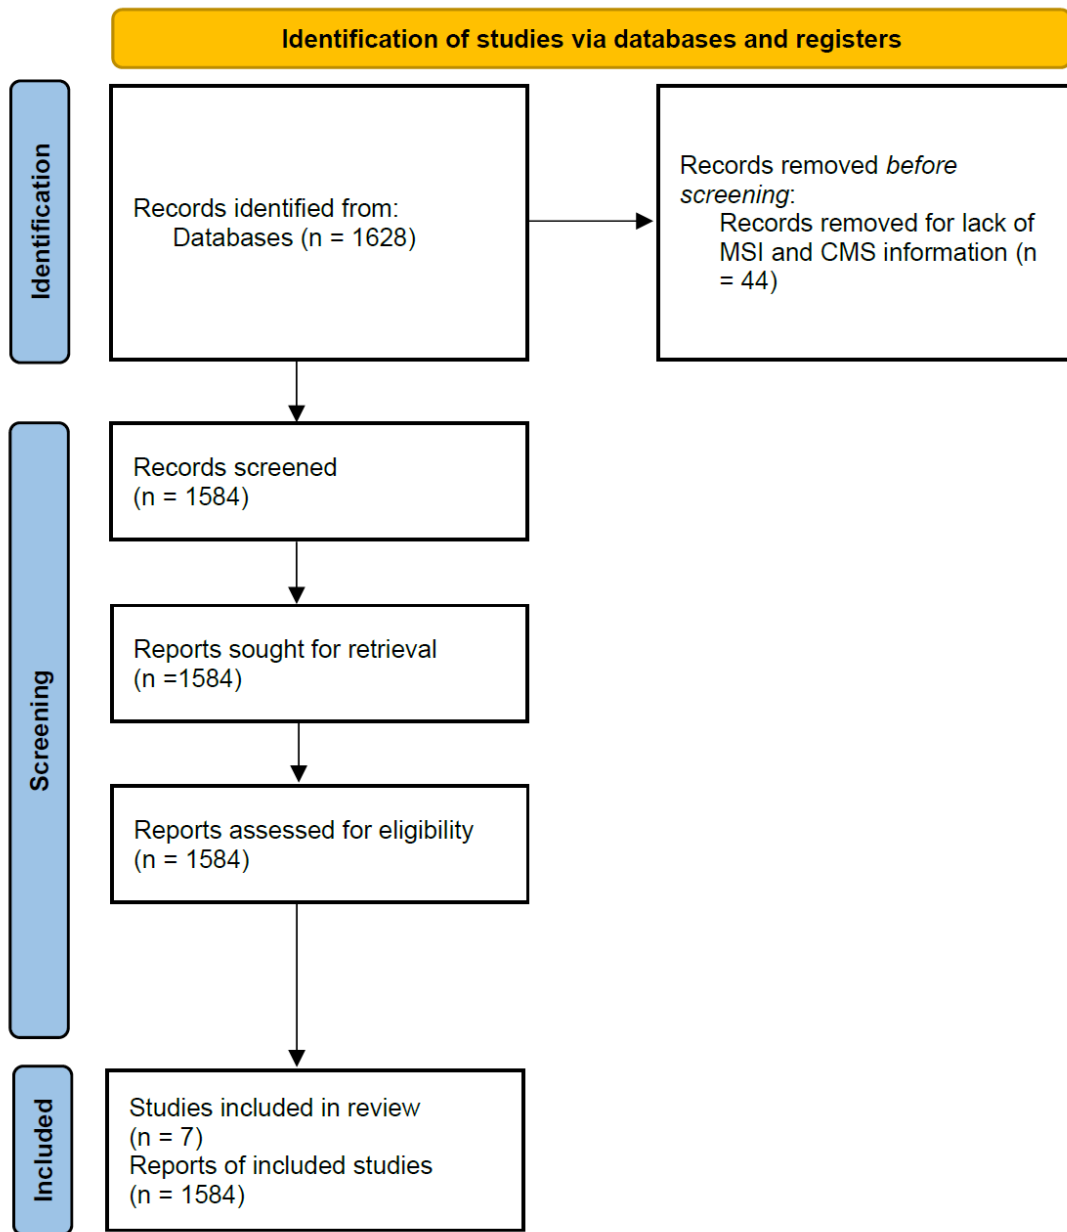

**Figure S5.** PRISMA Flow Diagram.

**Table S1.** The dataset used in this study

| Purpose              | Dataset                       | Platform              | Assay to detect MSI status                | No. of MSI | No. of MSS | No. of total samples | CSCSC |
|----------------------|-------------------------------|-----------------------|-------------------------------------------|------------|------------|----------------------|-------|
| Training             | TCGA-CRC                      | RNA-seq               | MSI-Mono-Dinucleotide assay               | 66         | 400        | 466                  | Y     |
| Internal validation  | TCGA-CRC                      | RNA-seq               | MSI-Mono-Dinucleotide assay               | 16         | 99         | 115                  | Y     |
| External validation  | Vasaikar <i>et al.</i> (2019) | RNA-seq               | MSI Analysis System Version 1.2 (Promega) | 24         | 82         | 106                  | N     |
| External validation  | GSE13067                      | Array, HG-U133_Plus_2 | Bethesda microsatellite panel             | 11         | 63         | 74                   | Y     |
| External validation  | GSE13294                      | Array, HG-U133_Plus_2 | Bethesda microsatellite panel             | 78         | 77         | 155                  | Y     |
| External validation  | GSE33113                      | Array, HG-U133_Plus_2 | MSI Analysis System Version 1.2 (Promega) | 25         | 65         | 90                   | Y     |
| External validation  | GSE39582                      | Array, HG-U133_Plus_2 | Bethesda microsatellite panel             | 75         | 444        | 519                  | Y     |
| External validation  | GSE75316                      | Array, HG-U133_Plus_2 | NA                                        | 11         | 48         | 59                   | N     |
| Total validation set |                               |                       | -                                         | 240        | 878        | 1118                 | -     |
| Total                |                               |                       | -                                         | 306        | 1278       | 1584                 | -     |

In the GSE75316 data, MSI status information was present, but information on the assay that detected it was not provided, so it was marked as NA (not available). The CRCSC column of the table indicates whether CRCSC was included in constructing the CMS classification system.

\* CRCSC ; Colorectal Cancer Subtyping Consortium, CMS ; consensus molecular subtype.

**Table S2.** Results of the MAP model in the validation datasets

| Purpose             | Platform | Dataset                       | Accuracy               | Kappa | Sensitivity | Specificity | F1    | Balanced Accuracy |
|---------------------|----------|-------------------------------|------------------------|-------|-------------|-------------|-------|-------------------|
| Internal validation | RNA-seq  | TCGA                          | 99.13<br>(95.25-99.98) | 96.27 | 93.75       | 100         | 96.77 | 96.88             |
| External validation | RNA-seq  | Vasaikar <i>et al.</i> (2019) | 98.11<br>(93.35-99.77) | 94.77 | 100         | 97.56       | 96    | 98.78             |
|                     | Array    | GSE13067                      | 98.65<br>(92.70-99.97) | 94.85 | 100         | 98.41       | 95.65 | 99.21             |
|                     | Array    | GSE13294                      | 90.32<br>(84.54-94.48) | 80.67 | 82.05       | 98.7        | 89.51 | 90.38             |
|                     | Array    | GSE33113                      | 93.33<br>(86.05-97.51) | 84.16 | 96          | 92.31       | 88.89 | 94.15             |
|                     | Array    | GSE39582                      | 93.26<br>(90.75-95.26) | 73.46 | 80          | 95.5        | 77.42 | 87.75             |
|                     | Array    | GSE75316                      | 100<br>(93.94-100)     | 100   | 100         | 100         | 100   | 100               |
| average             |          |                               | 96.11<br>(94.34-98.87) | 89.17 | 93.11       | 97.5        | 92.03 | 95.31             |
| average/rnaseq      |          |                               | 98.62<br>(97.62-99.61) | 95.52 | 96.88       | 98.78       | 96.39 | 97.83             |
| average/array       |          |                               | 95.11<br>(91.55-98.65) | 86.63 | 91.61       | 96.98       | 90.29 | 94.3              |

In the table, the numbers in parentheses in the accuracy column represent 95% confidence intervals.



**Table S3.** The MAP signatures

| <b>Symbol</b>   | <b>P-value</b> | <b>FDR</b> | <b>MSI median</b> | <b>MSS median</b> | <b>log<sub>2</sub> Fold-change</b> |
|-----------------|----------------|------------|-------------------|-------------------|------------------------------------|
| <b>LY6G6D</b>   | 2.02E-36       | 2.29E-32   | 0.72              | 8.48              | -7.77                              |
| <b>CYP2W1</b>   | 8.03E-20       | 2.77E-18   | 4.19              | 8.65              | -4.46                              |
| <b>TNNC2</b>    | 4.78E-32       | 2.71E-29   | 2.72              | 7.11              | -4.4                               |
| <b>CTTNBP2</b>  | 8.79E-32       | 4.33E-29   | 4.32              | 7.82              | -3.5                               |
| <b>NKD1</b>     | 2.67E-28       | 6.18E-26   | 5.97              | 9.22              | -3.25                              |
| <b>CAB39L</b>   | 3.38E-33       | 4.79E-30   | 6.37              | 8.58              | -2.21                              |
| <b>MLH1</b>     | 3.58E-28       | 7.50E-26   | 6.97              | 9.18              | -2.21                              |
| <b>EPM2AIP1</b> | 5.50E-27       | 8.54E-25   | 6.65              | 8.68              | -2.03                              |
| <b>SHROOM4</b>  | 5.61E-33       | 6.13E-30   | 7.12              | 9.13              | -2.02                              |
| <b>RNF43</b>    | 9.45E-34       | 1.78E-30   | 10.72             | 12.62             | -1.91                              |
| <b>PRR15</b>    | 6.98E-34       | 1.77E-30   | 9.48              | 11.09             | -1.6                               |
| <b>ATP9A</b>    | 8.97E-33       | 8.47E-30   | 10.66             | 12.18             | -1.53                              |
| <b>H2AFJ</b>    | 4.95E-21       | 2.19E-19   | 9.4               | 10.92             | -1.52                              |
| <b>FARP1</b>    | 4.49E-32       | 2.68E-29   | 9.63              | 11.04             | -1.41                              |
| <b>TCF7</b>     | 1.14E-32       | 9.92E-30   | 8.87              | 10.26             | -1.38                              |
| <b>MAPRE3</b>   | 1.99E-25       | 2.25E-23   | 7.12              | 8.4               | -1.28                              |
| <b>ZMYND8</b>   | 3.54E-32       | 2.35E-29   | 9.53              | 10.78             | -1.25                              |
| <b>DDX27</b>    | 3.15E-32       | 2.23E-29   | 9.9               | 11.12             | -1.22                              |
| <b>TGFBR2</b>   | 2.21E-22       | 1.27E-20   | 10.32             | 11.51             | -1.19                              |
| <b>PIWIL4</b>   | 3.50E-25       | 3.64E-23   | 6.45              | 7.63              | -1.18                              |
| <b>FECH</b>     | 8.36E-32       | 4.31E-29   | 9.09              | 7.94              | 1.15                               |
| <b>DOCK5</b>    | 7.96E-28       | 1.61E-25   | 9.49              | 8.32              | 1.17                               |
| <b>TYMS</b>     | 3.73E-32       | 2.35E-29   | 10.92             | 9.58              | 1.35                               |
| <b>HPSE</b>     | 2.83E-30       | 1.00E-27   | 8.03              | 6.49              | 1.54                               |
| <b>ASPHD2</b>   | 2.24E-33       | 3.63E-30   | 8.82              | 7.18              | 1.64                               |
| <b>AGR2</b>     | 2.03E-23       | 1.42E-21   | 15                | 13.16             | 1.84                               |
| <b>GFI1</b>     | 2.91E-28       | 6.47E-26   | 7.37              | 5.34              | 2.03                               |
| <b>RPL22L1</b>  | 3.44E-28       | 7.35E-26   | 11.47             | 9.39              | 2.08                               |
| <b>RAB27B</b>   | 4.87E-33       | 6.13E-30   | 6.79              | 4.08              | 2.71                               |
| <b>GNLY</b>     | 2.87E-28       | 6.47E-26   | 8.31              | 5.49              | 2.82                               |
| <b>DUSP4</b>    | 7.27E-29       | 2.06E-26   | 10.33             | 7.49              | 2.85                               |

Comparisons of MSI vs. MSS groups were conducted using the Wilcoxon rank sum test. Fold-change means log<sub>2</sub> (MSI/MSS). Blue genes are down-regulated and red are genes up-regulated in MSI compared with MSS.

**Table S4.** The MSI signatures in STAD, UCEC and preMSIm

| <b>MAP_STAD</b> |          | <b>MAP_UCEC</b> | <b>preMSIm_15 gene-set</b> |
|-----------------|----------|-----------------|----------------------------|
| MLH1            | PPP1R1B  | MLH1            | DDX27                      |
| EPM2AIP1        | DTX3     | EPM2AIP1        | EPM2AIP1                   |
| F12             | CXCL14   | RNLS            | HENMT1                     |
| RPL22L1         | ZNF134   | H2AFJ           | LYG1                       |
| GSTA4           | CES3     | CXCL13          | MLH1                       |
| HOXA11          | DNASE1L3 | ZNF300          | MSH4                       |
| PLEKHH2         | SHROOM2  | HOXA9           | NHLRC1                     |
| GAMT            | ZNF461   | TNFSF9          | NOL4L                      |
| SCAMP5          | TMEM52   | SDR42E1         | RNLS                       |
| IRAK3           | WNT4     |                 | RPL22L1                    |
| ZNF606          | SERP2    |                 | RTF2                       |
| EFNA3           | POLR3G   |                 | SHROOM4                    |
| TNFSF9          | RBP7     |                 | SMAP1                      |
| KRT23           | GPR143   |                 | TTC30A                     |
| PLEKHB1         | C3orf14  |                 | ZSWIM3                     |
| ALDH1A1         | GPC3     |                 |                            |
| NMU             | METTL7A  |                 |                            |
| HOXA10          | CARD11   |                 |                            |
| GPRC5B          | VANGL2   |                 |                            |
| FUZ             | EPHA4    |                 |                            |
| GPA33           | COL11A1  |                 |                            |
| F10             | KIAA1257 |                 |                            |
| TCEA2           | PON3     |                 |                            |
| RGS5            | HOXA9    |                 |                            |
| ZNF790          | APOD     |                 |                            |
| CTSF            | CASP5    |                 |                            |
| RBP1            | FRZB     |                 |                            |
| GSTA1           | NUP210   |                 |                            |
| HOXA13          | FAM84A   |                 |                            |
| CPNE7           | FBXO17   |                 |                            |
| ZNF43           | NOS2     |                 |                            |
| IL34            | ZSCAN18  |                 |                            |
| PBK             | SYT13    |                 |                            |
| NHLRC1          | CCDC106  |                 |                            |
| RAB37           | QPRT     |                 |                            |
| ENPP5           | ANKRD29  |                 |                            |
| TMPRSS13        | PFN2     |                 |                            |

---

SPAG16

DNAJC12

TPPP3

ZNF300

---
